# Supplementary material for: A facile synthesis of monodisperse cobalt–ruthenium alloy nanoparticles as catalysts for the dehydrogenation of morpholine borane and the hydrogenation of various organic compounds
Source: Royal Society of Chemistry journal article supplement (doi:10.1039/d2nj01761j), 2022-01-01

**A facile synthesis of monodisperse cobalt-ruthenium alloy nanoparticles as catalysts for the dehydrogenation of morpholine borane and the hydrogenation of various organic compounds**

Hasan Can,<sup>a,b</sup> Sümeyra Can,<sup>a</sup> Rüstem Ebiri,<sup>a</sup> Önder Metin<sup>c,d\*</sup>

<sup>a</sup>Department of Chemistry, Faculty of Science, Atatürk University, 25240 Erzurum, TURKEY

<sup>b</sup>East Anatolian High Technology Research and Application Center (DAYTAM), Atatürk University, 25240 Erzurum, TURKEY

<sup>c</sup>Department of Chemistry, College of Sciences, Koç University, 34450 Sarıyer, Istanbul, TURKEY

\* To whom should be corresponded: Assoc. Prof. Ö. Metin; e-mail: [ometin@ku.edu.tr](mailto:ometin@ku.edu.tr)

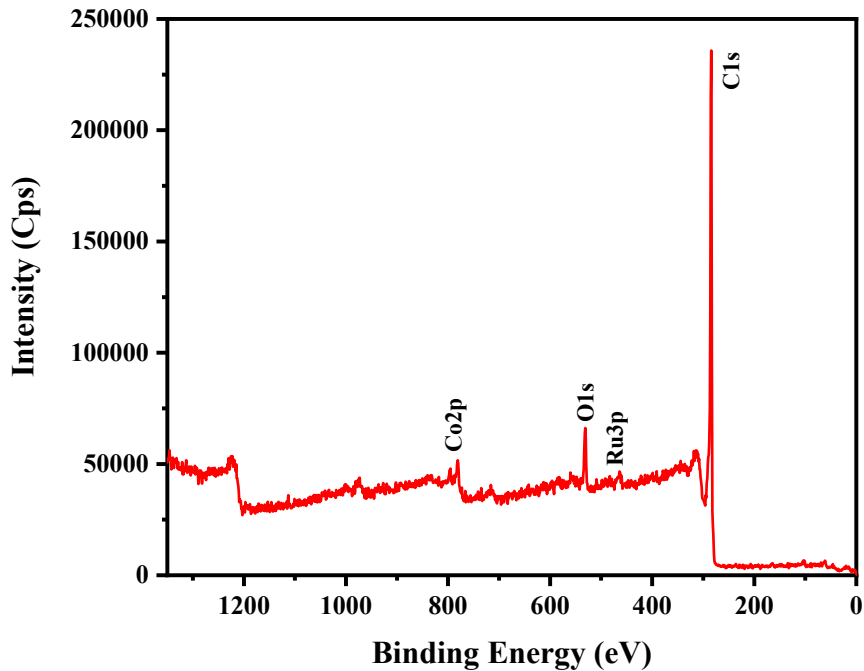

**Figure S1.** XPS survey spectrum of VC-Co<sub>70</sub>Ru<sub>30</sub> nanocatalysts

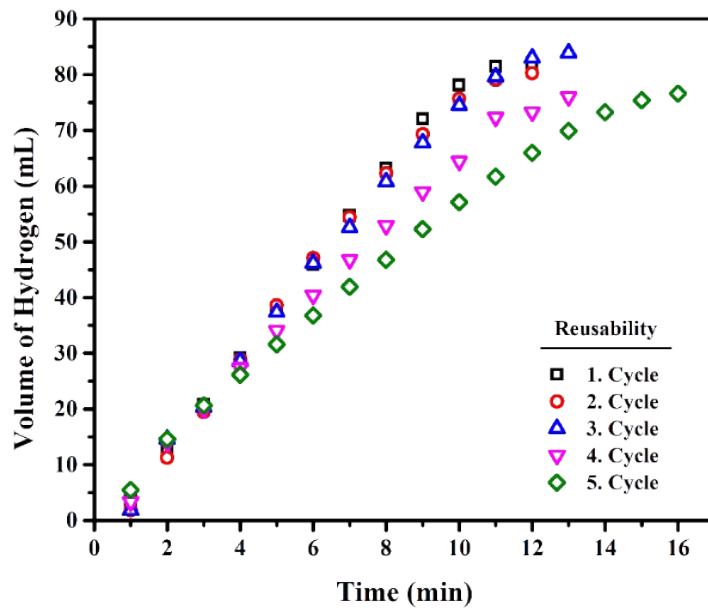

**Figure S2.** The volume of hydrogen gas released during the 5-cycle reusability test in the hydrolysis of MB of the VC-Co<sub>70</sub>Ru<sub>30</sub> nanocatalysts

**Table S1.** The amount of metal precursors used in the synthesis of three different compositions of  $\text{Co}_x\text{Ru}_{1-x}$  alloy nanoparticles

| <b><math>\text{Co}_2(\text{CO})_8</math> (mmol)</b> | <b><math>\text{Ru}(\text{acac})_3</math> (mmol)</b> | <b><math>\text{Co}_x\text{Ru}_{1-x}</math></b> |
|-----------------------------------------------------|-----------------------------------------------------|------------------------------------------------|
| 0.20                                                | 0.20                                                | $\text{Co}_{70}\text{Ru}_{30}$                 |
| 0.15                                                | 0.25                                                | $\text{Co}_{60}\text{Ru}_{40}$                 |
| 0.30                                                | 0.10                                                | $\text{Co}_{80}\text{Ru}_{20}$                 |

# APPENDIX

|                                                                                                                                                                                                                                                                                                                            |                                                                                                               |
|----------------------------------------------------------------------------------------------------------------------------------------------------------------------------------------------------------------------------------------------------------------------------------------------------------------------------|---------------------------------------------------------------------------------------------------------------|
| <b>Table 2 Entry 1</b>                                                                                                                                                                                                                                                                                                     | 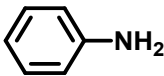 <chem>Nc1ccccc1</chem>      |
|  <p>The 1H NMR spectrum of aniline shows a multiplet in the aromatic region between 6.5 and 7.5 ppm, and a singlet at approximately 3.4 ppm. The x-axis is labeled from 9 to 0 ppm.</p>                                                 |                                                                                                               |
| <b>Table 2 Entry 2</b>                                                                                                                                                                                                                                                                                                     |  <chem>Cc1ccc(N)cc1</chem> |
|  <p>The 1H NMR spectrum of p-toluidine shows a multiplet in the aromatic region between 6.5 and 7.5 ppm, a singlet at approximately 2.8 ppm, and a sharp singlet at approximately 2.3 ppm. The x-axis is labeled from 10 to 0 ppm.</p> |                                                                                                               |

Table 2  
Entry 3

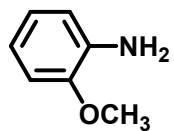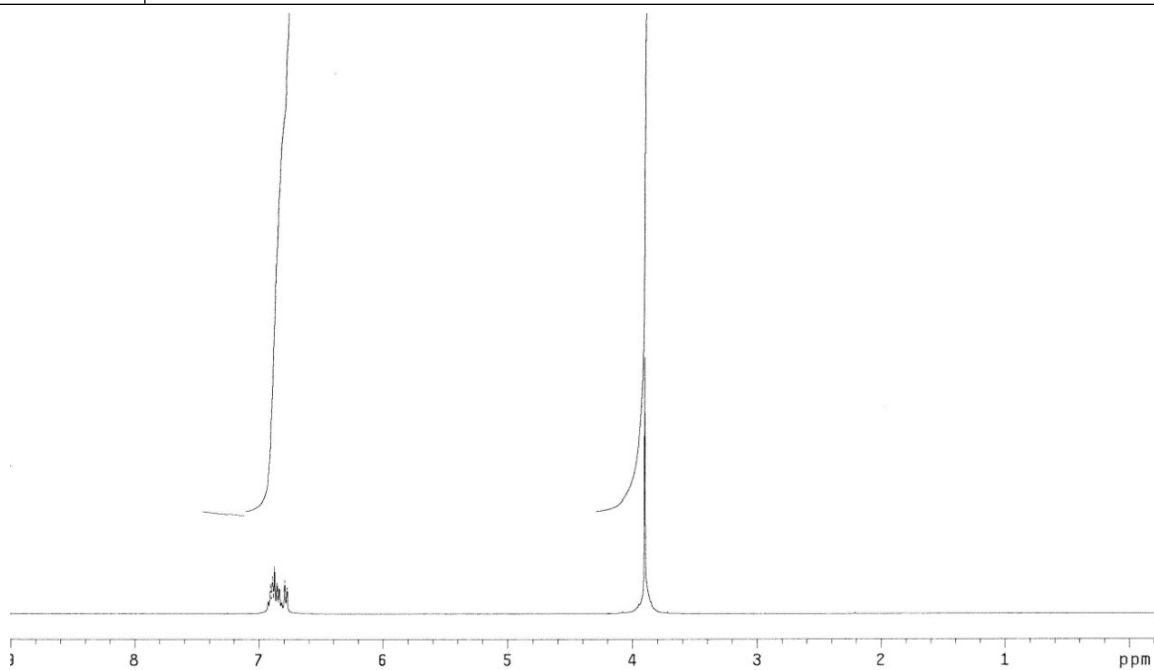

Table 2  
Entry 4

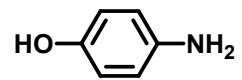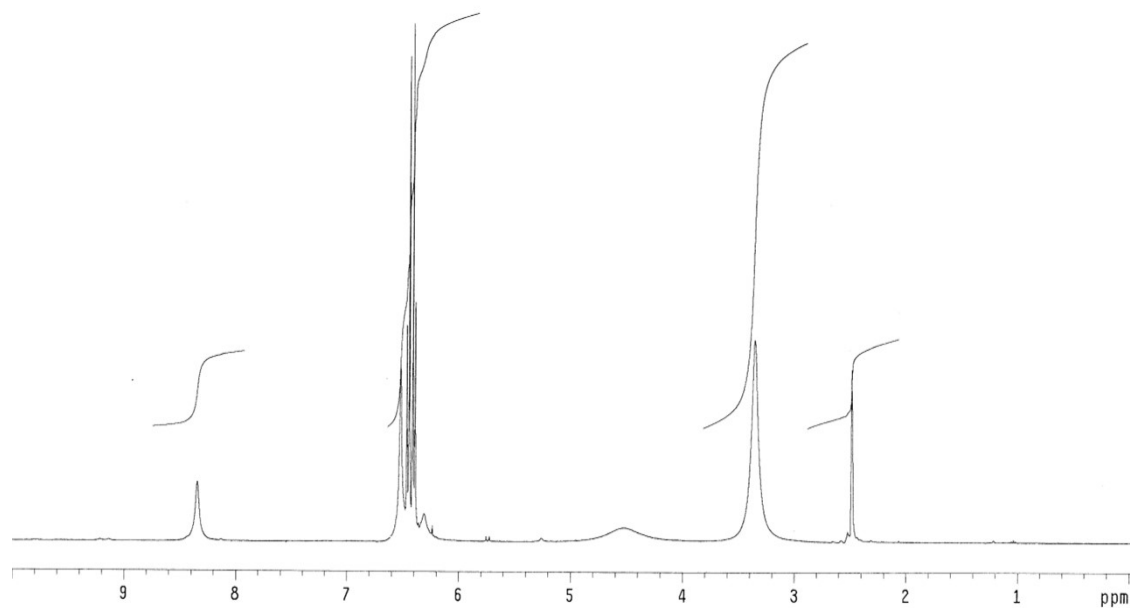

Table 2  
Entry 5

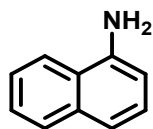

| INDEX | FREQUENCY | PPM   | HEIGHT |
|-------|-----------|-------|--------|
| 1     | 3187.324  | 7.973 | 10.7   |
| 2     | 3184.758  | 7.967 | 7.7    |
| 3     | 3182.425  | 7.962 | 8.3    |
| 4     | 3180.726  | 7.957 | 12.1   |
| 5     | 3177.426  | 7.948 | 12.8   |
| 6     | 3095.308  | 7.743 | 13.4   |
| 7     | 3092.375  | 7.736 | 16.5   |
| 8     | 3090.175  | 7.730 | 11.9   |
| 9     | 3088.342  | 7.725 | 12.0   |
| 10    | 3085.776  | 7.719 | 16.6   |
| 11    | 3083.210  | 7.713 | 5.9    |
| 12    | 2964.065  | 7.415 | 5.3    |
| 13    | 2962.965  | 7.412 | 5.4    |
| 14    | 2960.032  | 7.404 | 42.2   |
| 15    | 2957.100  | 7.397 | 22.1   |
| 16    | 2956.368  | 7.395 | 27.5   |
| 17    | 2954.167  | 7.390 | 22.3   |
| 18    | 2953.067  | 7.387 | 25.6   |
| 19    | 2950.501  | 7.381 | 38.3   |
| 20    | 2947.568  | 7.373 | 8.8    |
| 21    | 2946.468  | 7.371 | 8.6    |
| 22    | 2888.912  | 7.227 | 48.0   |
| 23    | 2884.146  | 7.215 | 72.2   |
| 24    | 2725.042  | 6.817 | 18.1   |
| 25    | 2721.009  | 6.807 | 23.9   |
| 26    | 2716.610  | 6.796 | 17.6   |
| 27    | 1835.386  | 4.851 | 137.0  |
| 28    | 1832.453  | 4.834 | 19.7   |
| 29    | 1829.887  | 3.312 | 7.5    |
| 30    | 1825.064  | 3.307 | 15.6   |
| 31    | 1820.598  | 3.303 | 24.5   |
| 32    | 1816.765  | 3.298 | 19.6   |
| 33    | 1817.288  | 3.295 | 13.9   |

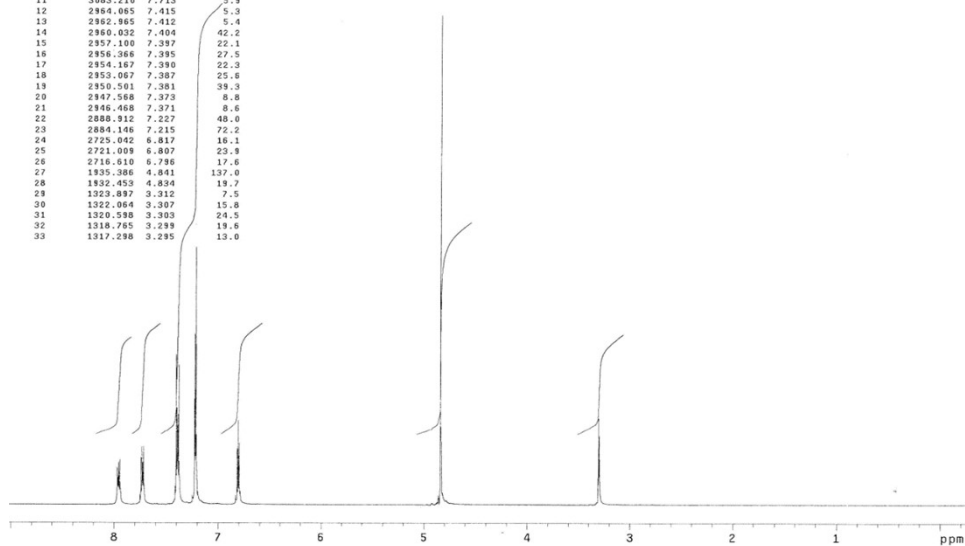

Table 2  
Entry 6

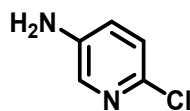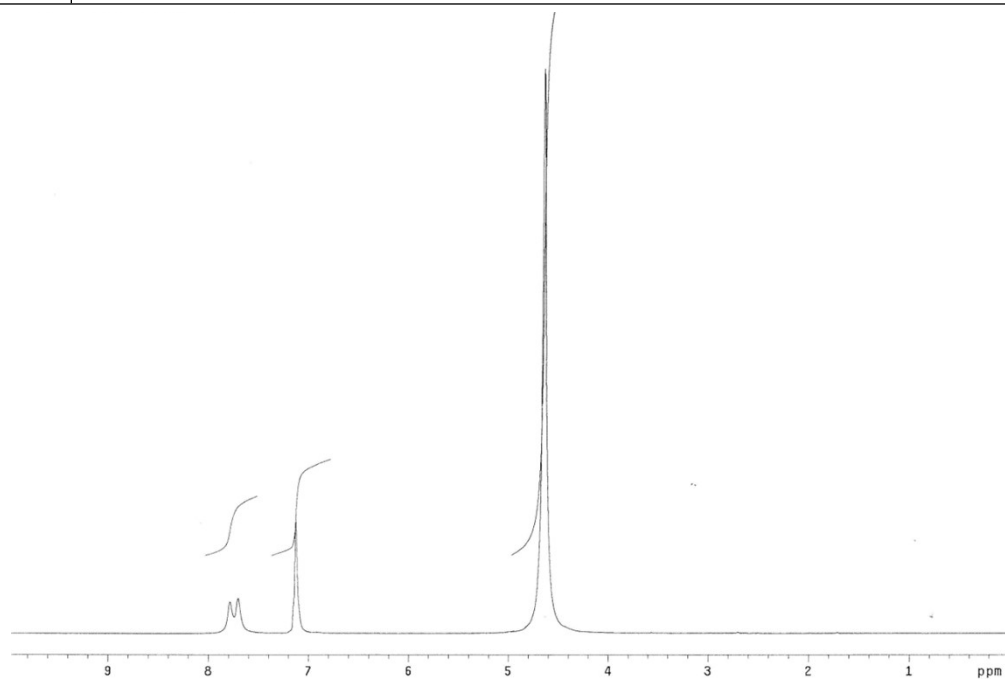

Table 2  
Entry 7

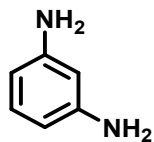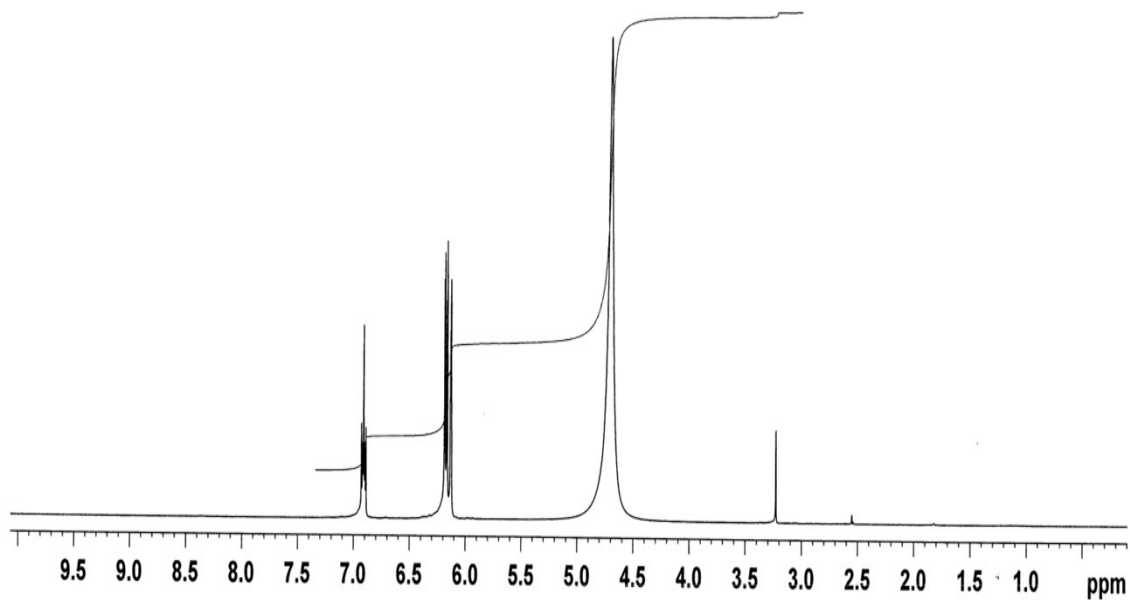

Table 2  
Entry 8

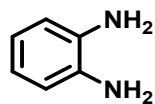

| INDEX | FREQUENCY | PPM   | HEIGHT |
|-------|-----------|-------|--------|
| 1     | 2688.381  | 6.725 | 4.8    |
| 2     | 2684.715  | 6.718 | 7.9    |
| 3     | 2683.982  | 6.714 | 6.3    |
| 4     | 2679.216  | 6.702 | 11.7   |
| 5     | 2677.383  | 6.697 | 3.3    |
| 6     | 2675.550  | 6.693 | 4.2    |
| 7     | 2674.450  | 6.690 | 3.6    |
| 8     | 2672.617  | 6.686 | 4.6    |
| 9     | 2669.318  | 6.677 | 13.7   |
| 10    | 2666.018  | 6.669 | 8.2    |
| 11    | 2664.919  | 6.666 | 8.3    |
| 12    | 2663.452  | 6.660 | 7.1    |
| 13    | 2659.786  | 6.653 | 5.6    |
| 14    | 1875.629  | 4.692 | 3.7    |
| 15    | 1856.199  | 4.643 | 168.6  |
| 16    | 1835.670  | 4.592 | 3.4    |

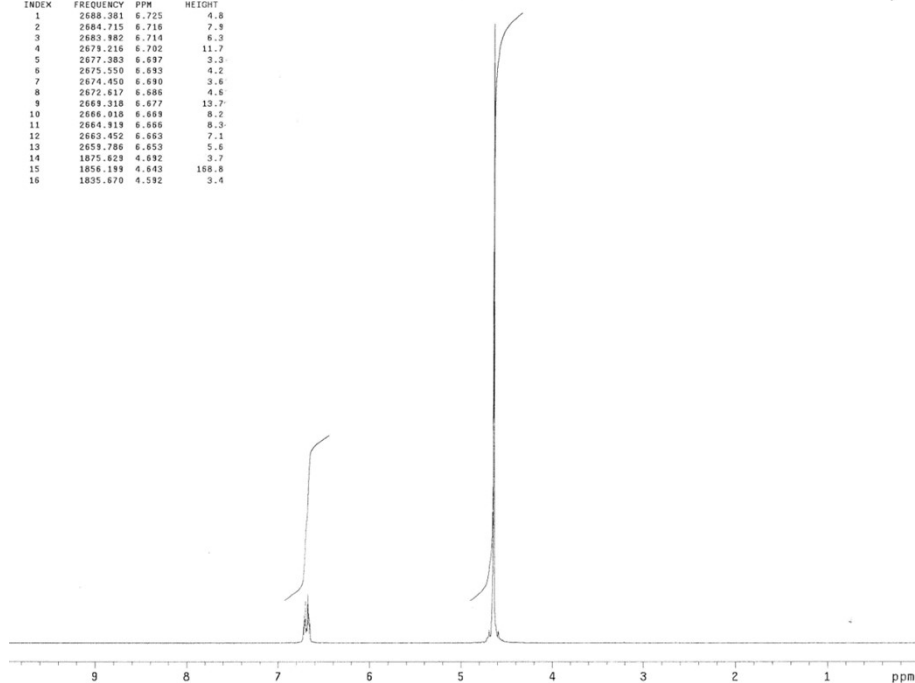

Table 2  
Entry 9

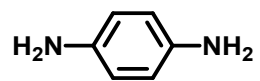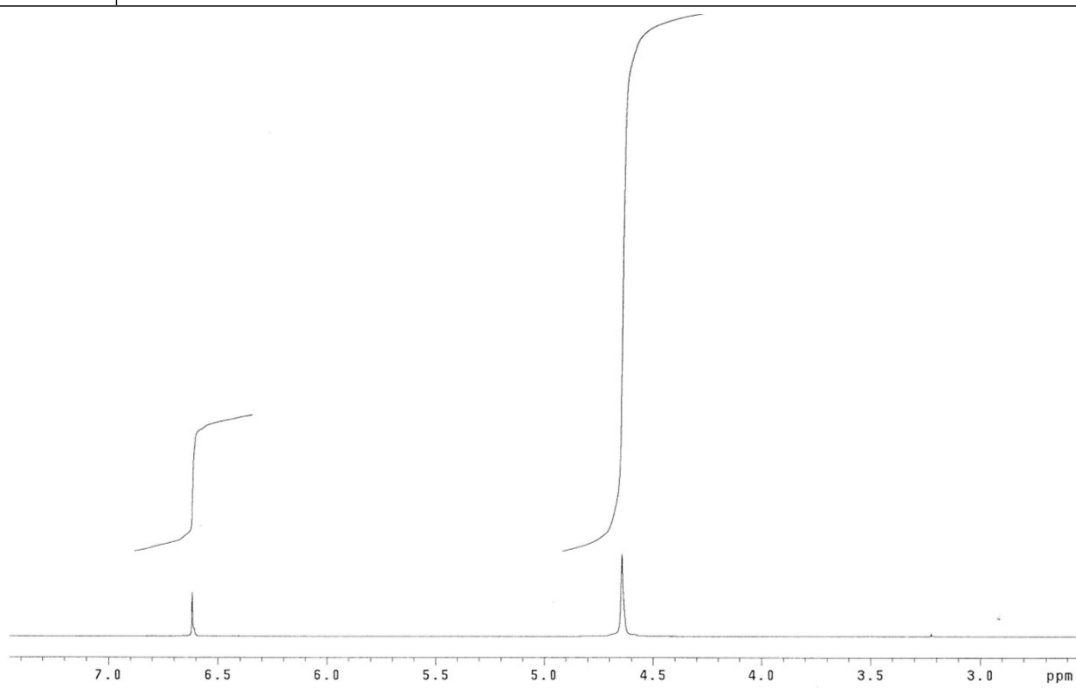

Table 2  
Entry 10

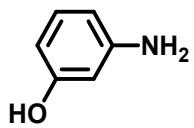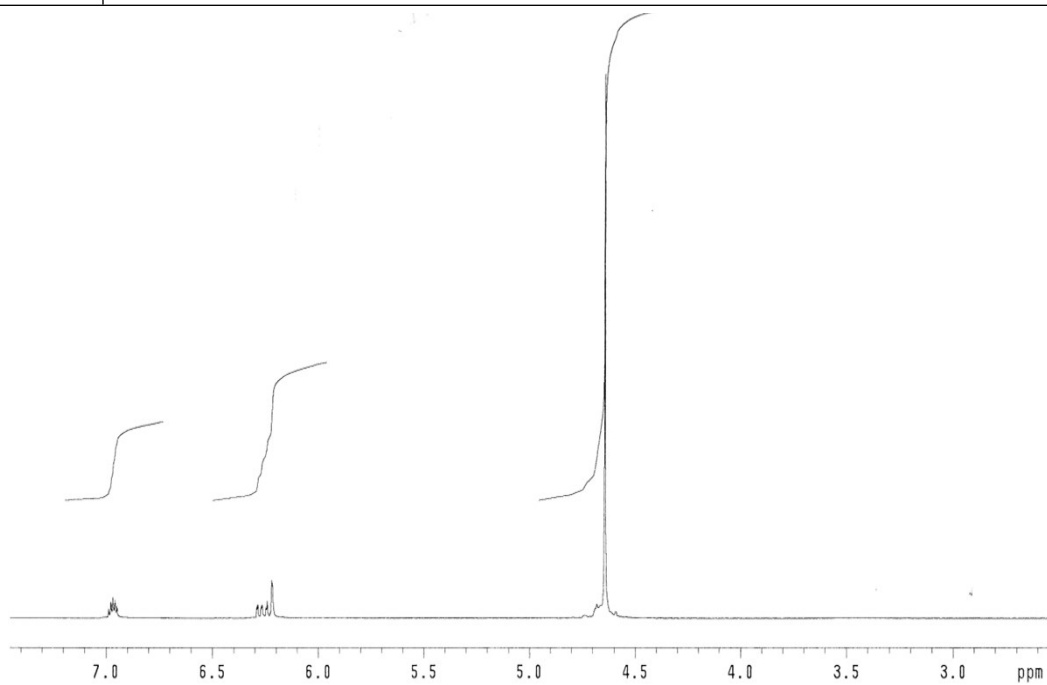



Table 2  
Entry 11

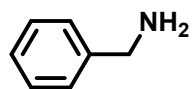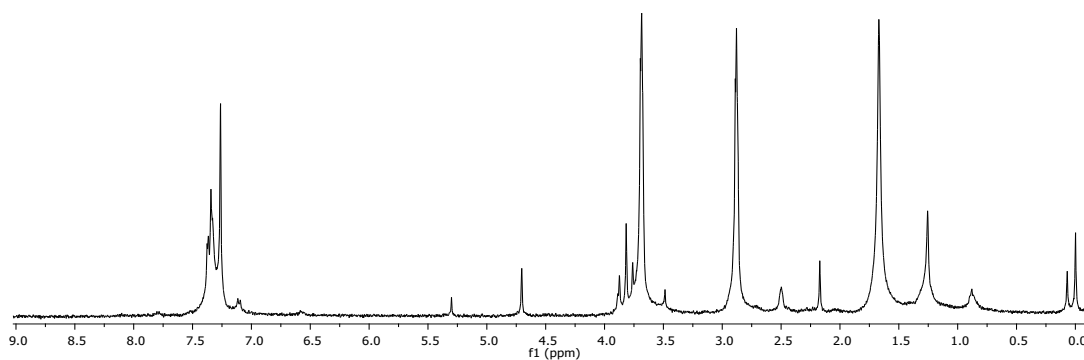

Table 2  
Entry 12

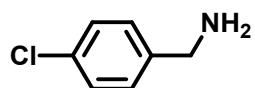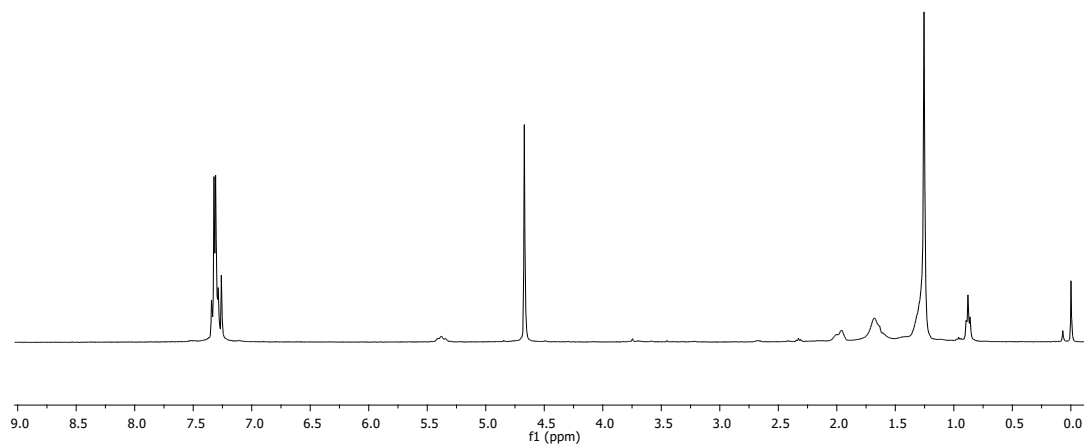

Table 2  
Entry 13

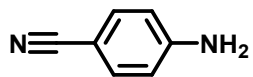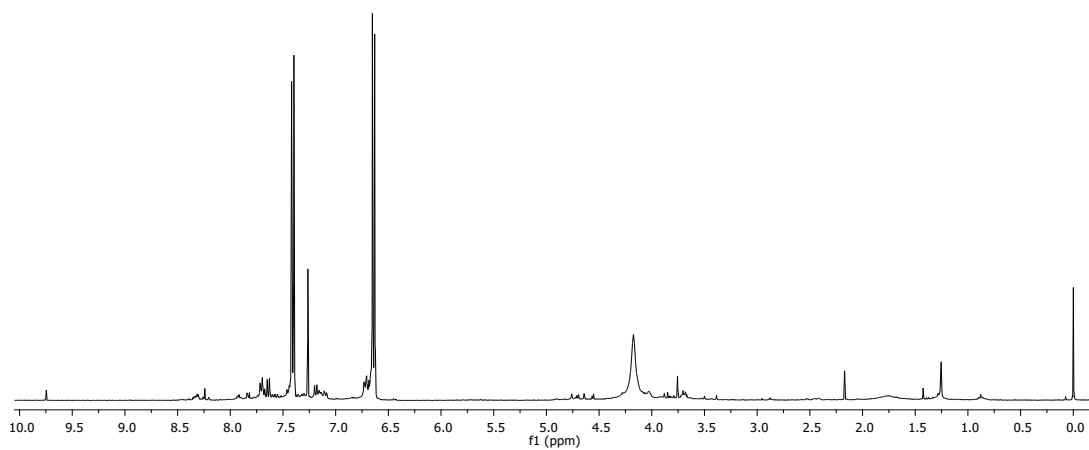

Table 3  
Entry 1

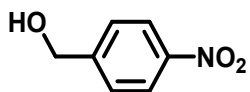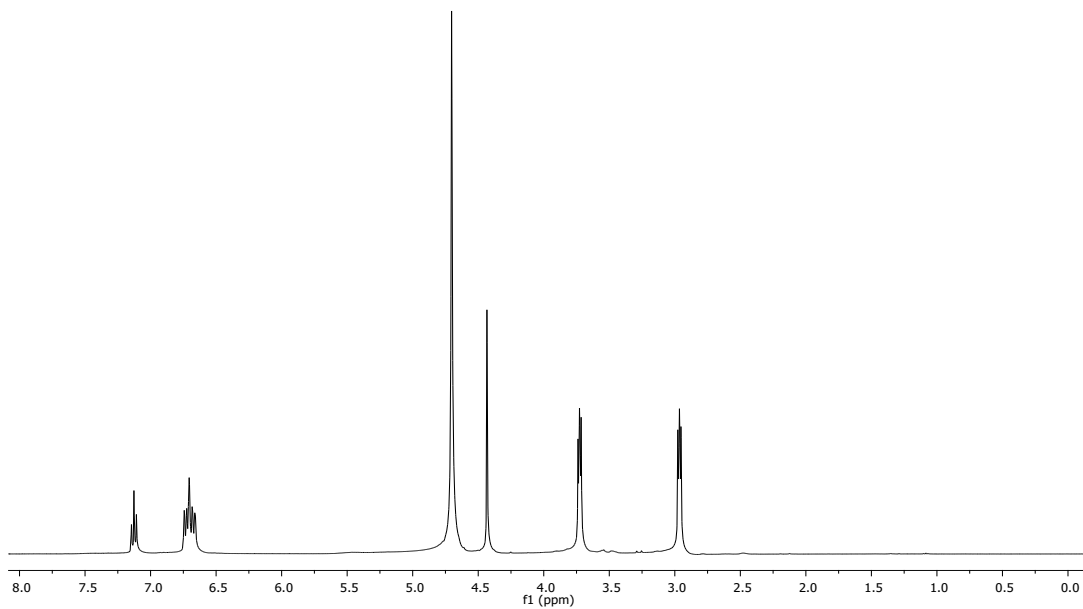

Table 3  
Entry 2

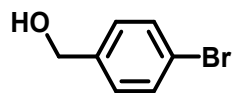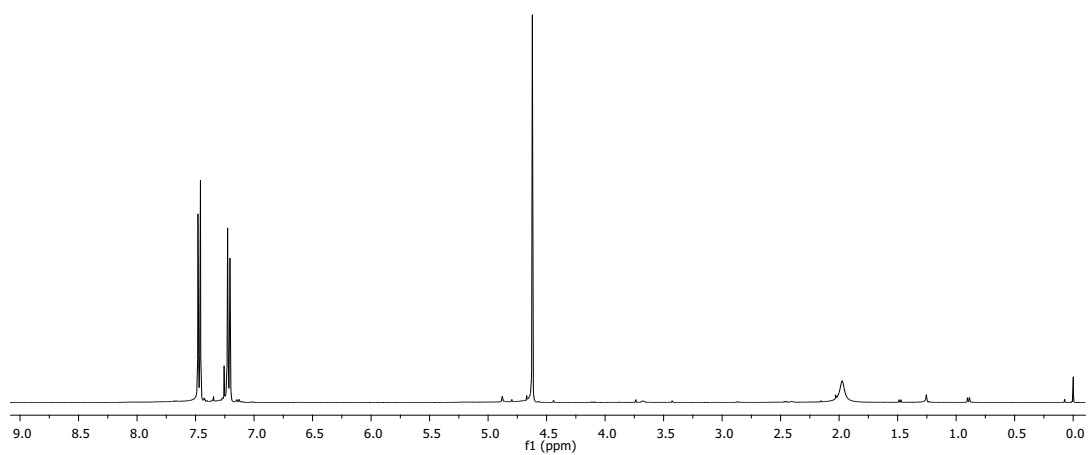

Table 3  
Entry 3

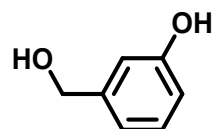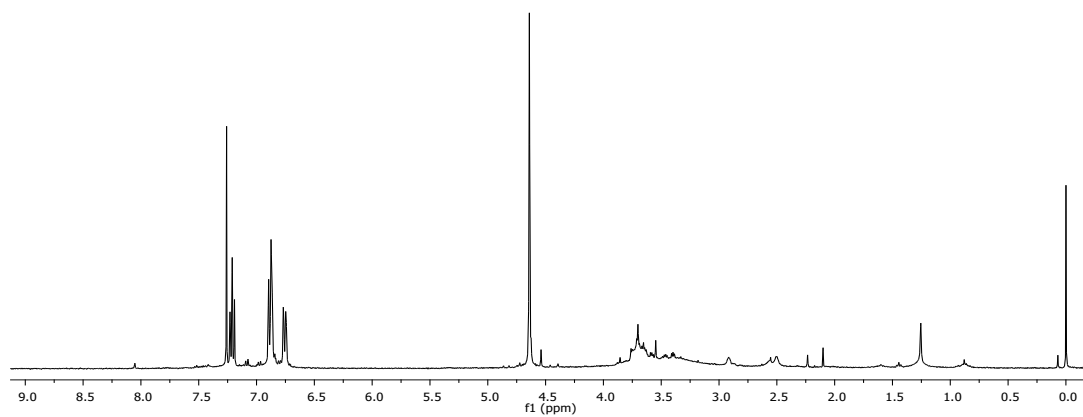

Table 3  
Entry 4

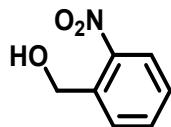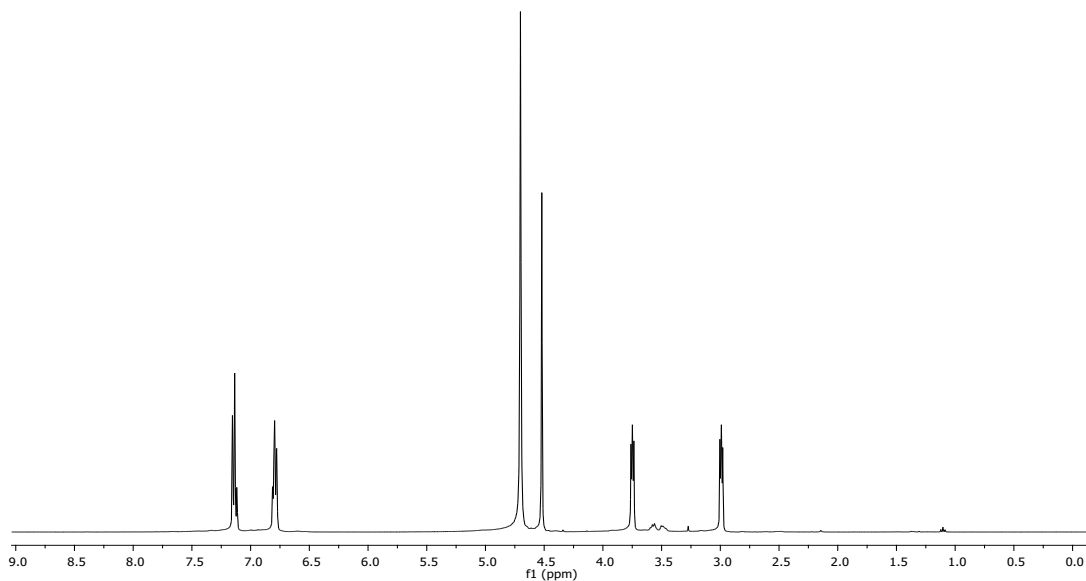

Table 3  
Entry 5

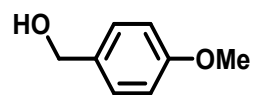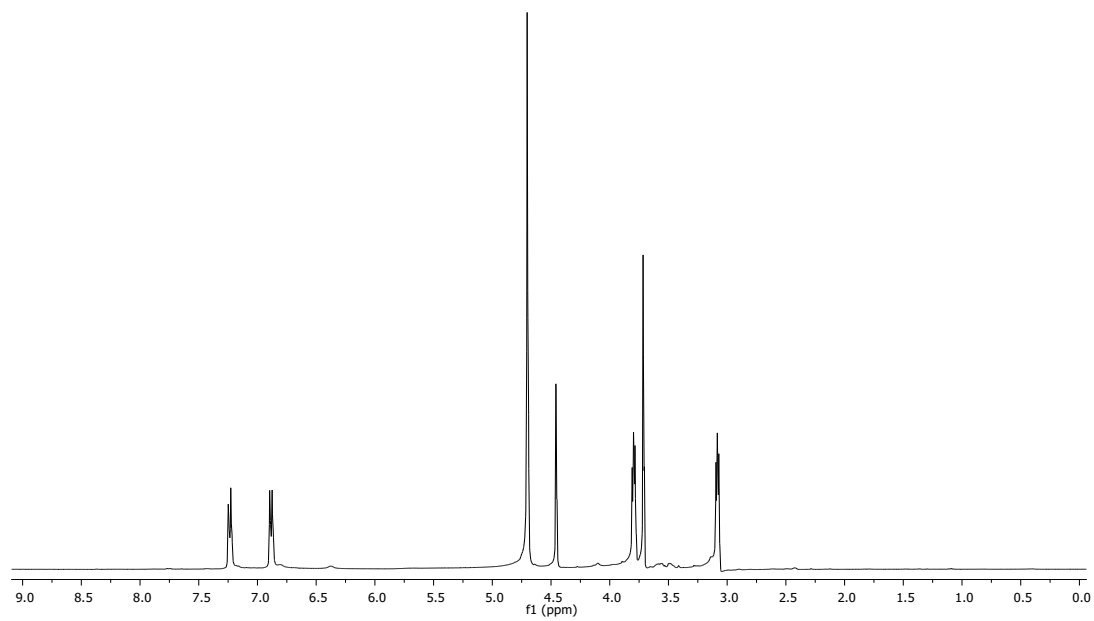

Table 3  
Entry 6

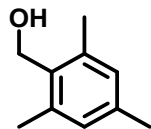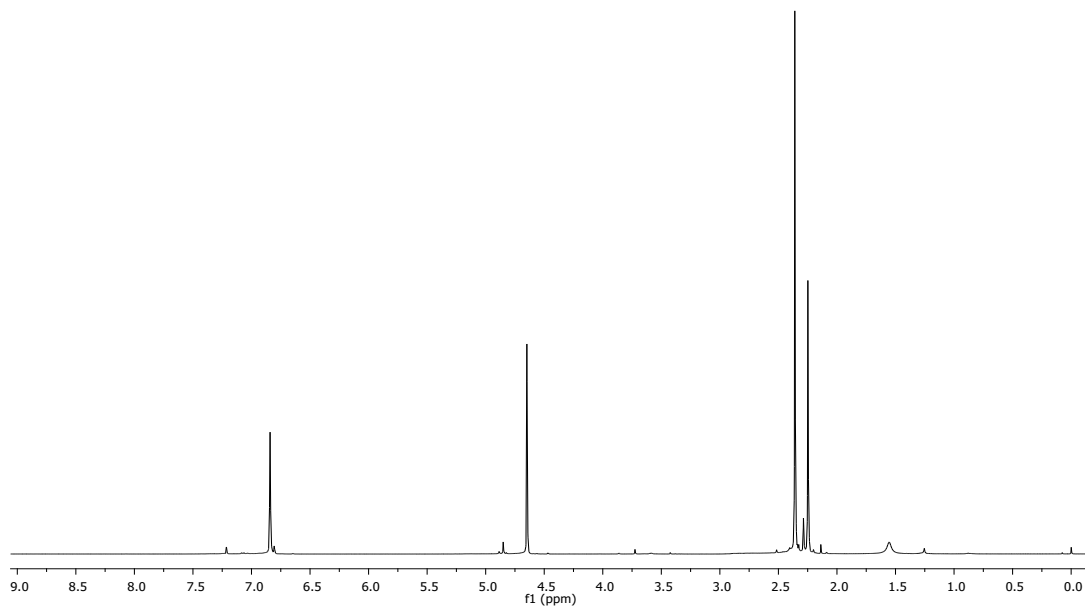

Table 3  
Entry 7

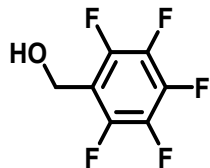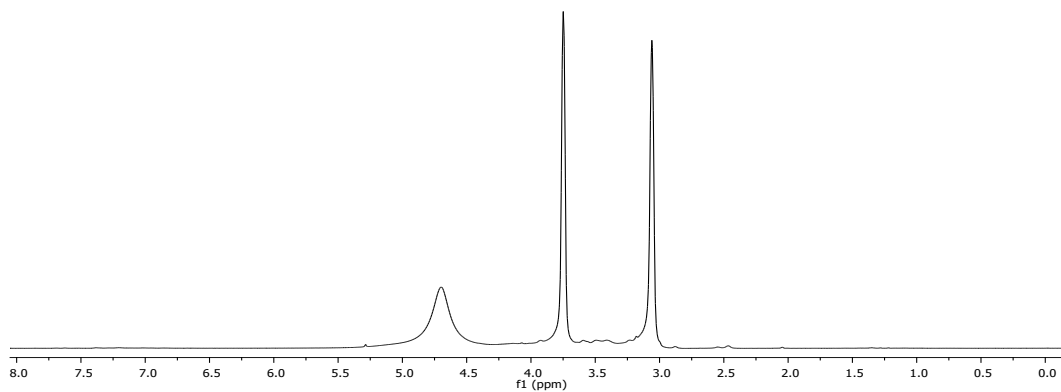

Table 3  
Entry 8

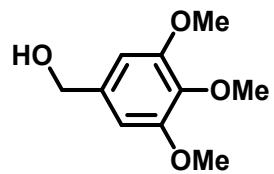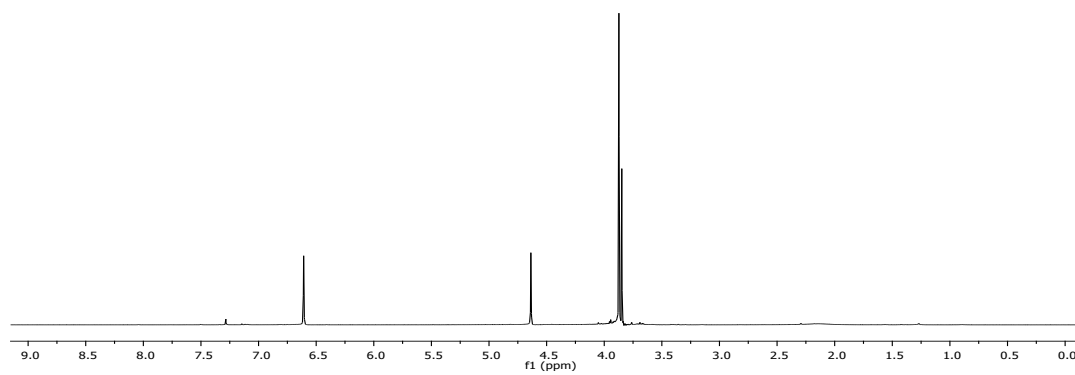

Table 3  
Entry 9

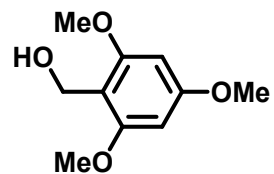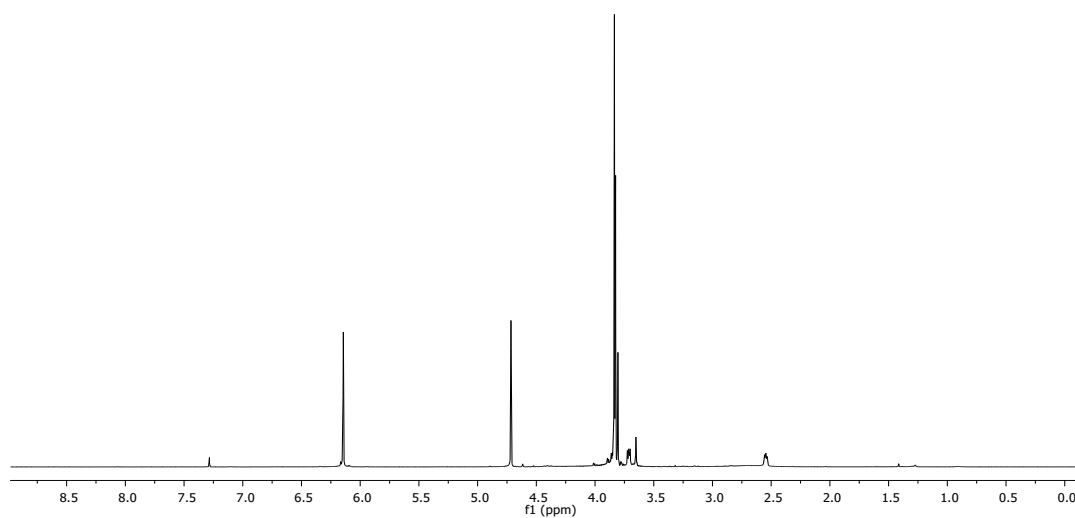

Table 3  
Entry 10

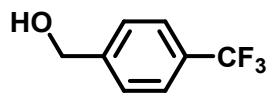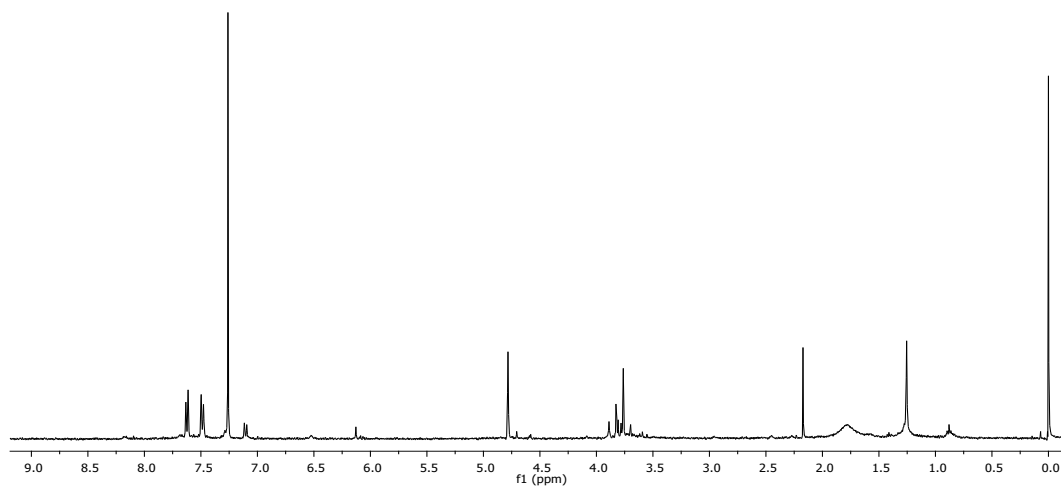

Table 3  
Entry 11

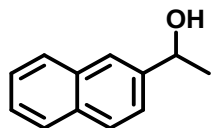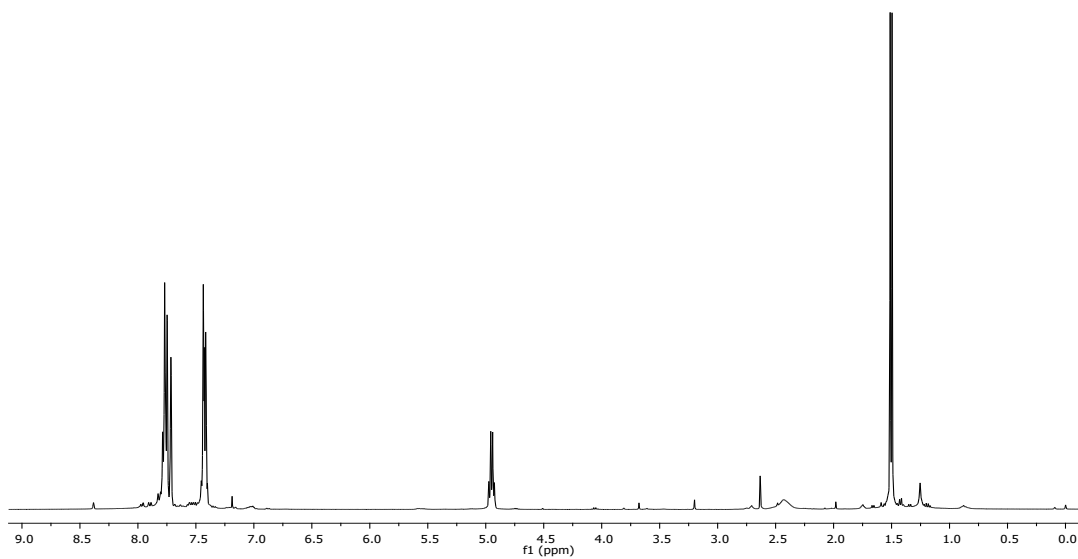

Table 3  
Entry 12

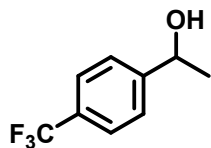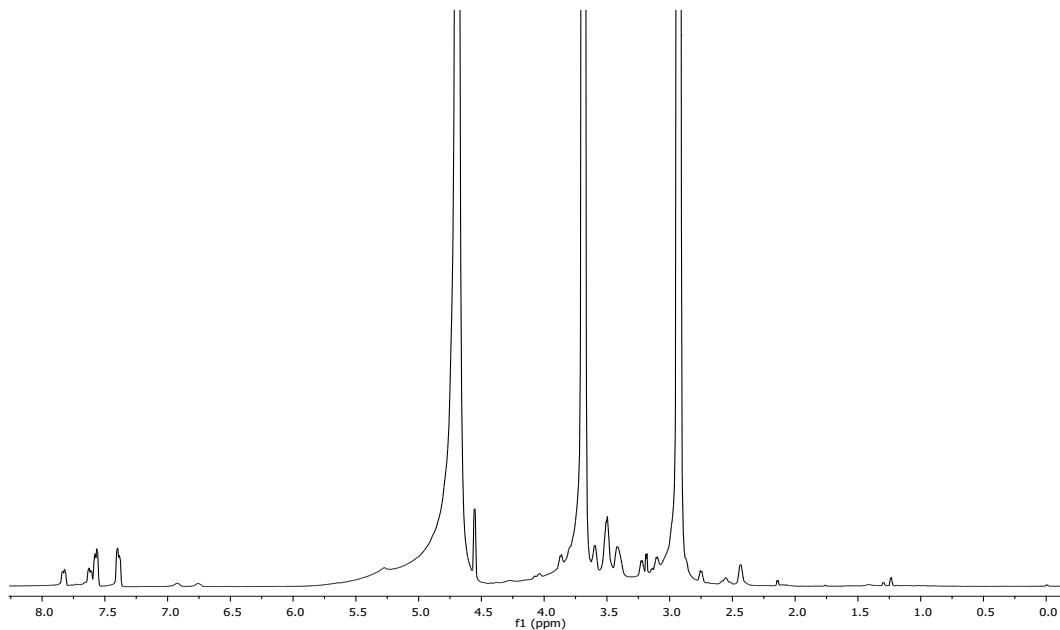

Table 3  
Entry 13

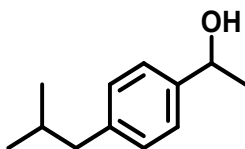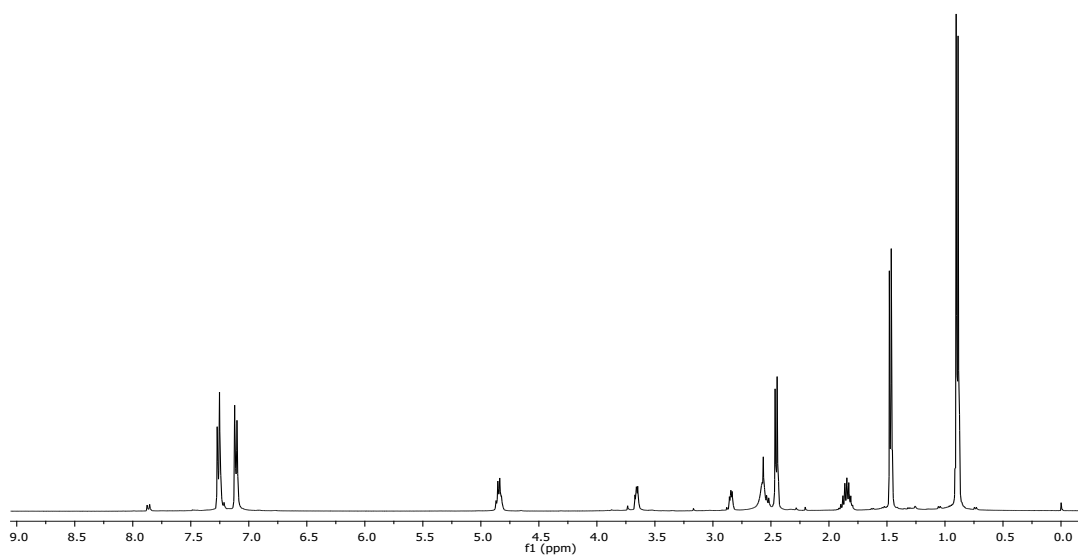



Table 3  
Entry 14

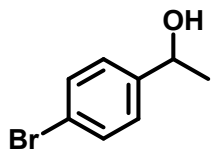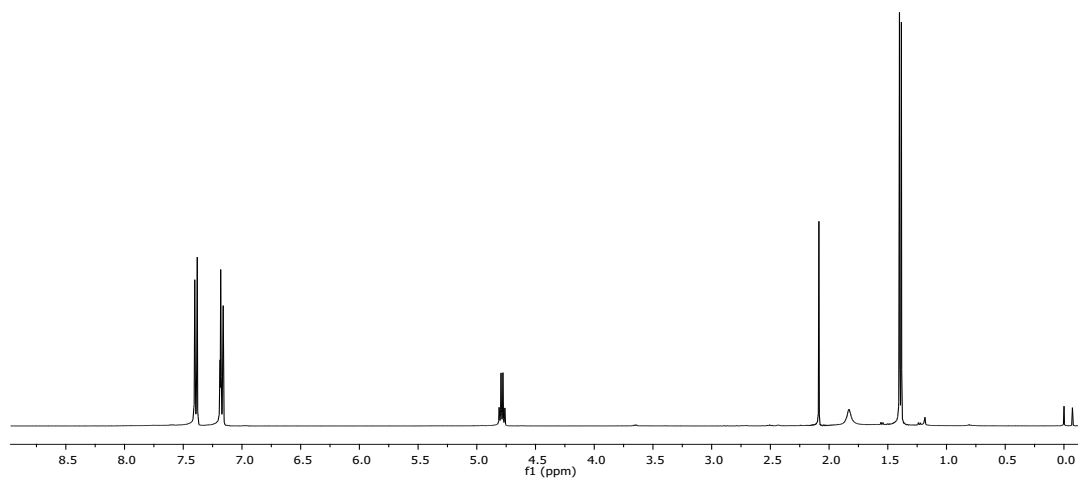

Supplement: d2nj01761j1.pdf [file d2nj01761j1.pdf]
